# Supplementary material
Source: PubMed Central journal article supplement (PMC3809386)
Supplement: Supp_Figure1.pdf [file Supp_Figure1.pdf]

**SUPPLEMENTARY FIGURE 1**

(A)

Haptoglobin peptide sequence:

```

1  MSALGAVIAL  LLWGQLFAVD  SGNDVTDIAD  DGCPKPPEIA  HGYVEHSVRY
51  QCKNYYKLRT  EGDGVYTLND  KKQWINKAVG  DKLPECEADD  GCPKPPEIAH
101 GYVEHSVRYQ  CKNYYKL RTE  GDGVYTLNNE  KQWINKAVGD  KLPECEAVCG
151 KPKNPANPVQ  RILGGHLDKA  GSFPWQAKMV  SHHNLTTGAT  LINEQWLLTT
201 AKNLFLNHSE  NATAKDIAPT  LTLYVGKKQL  VEIEKVV LHP  NYSQVDIGLI
251 KLKQKVSVNE  RVMPICLPSK  DYAEVGRVGY  VSGWGRNANF  KFTDHLKYVM
301 LPVADQDQCI  RHYEGSTVPE  KKT PKSPVGV  QPILNEHTFC  AGMSKYQEDT
351 CYGDAGSAFA  VHDLEEDTWY  ATGILSFDKS  CAVA EYGVYV  KVTSIQDWVQ
401 KTIAEN

```

Red or Blue: sequence coverage of LC-MSMS analysis

Blue: Hp 2 specific peptide sequence

Bold: MS detectable Hp 2 specific peptide

(B)

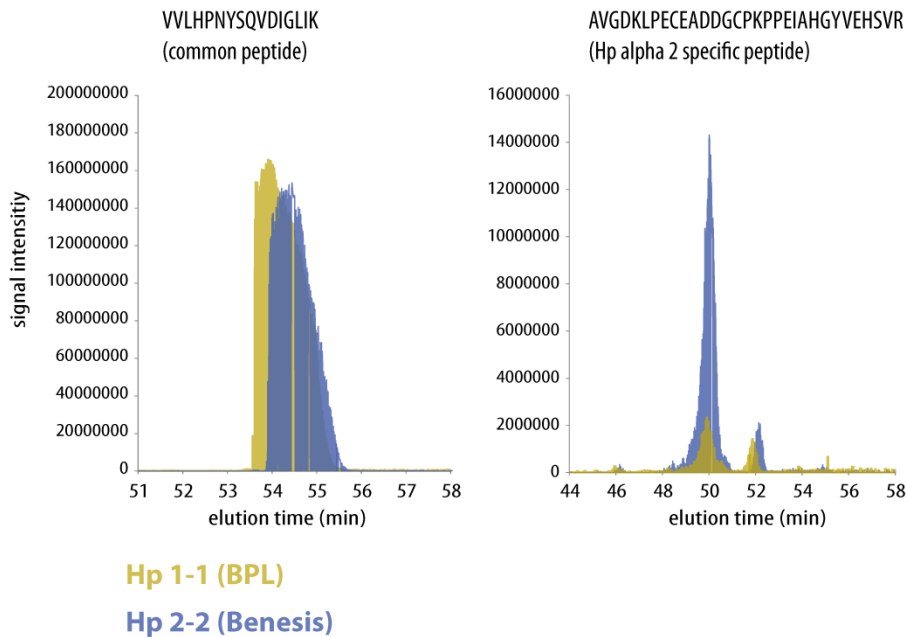**Haptoglobin phenotype determination by mass spectrometry.**

The Hp products from BPL (Hp 1-1) and from Benesis Corp. (Hp 2-2) were analyzed by LC-MSMS mass spectrometry with an Orbitrap Velos instrument after digestion with LysC and trypsin. Equal amounts ( $\mu\text{g}$ ) of both products were digested and analyzed. (A) shows the peptide sequence of Hp 2-2. Highlighted are the sequence coverage obtained by MS analysis, the peptide sequence that is specific for the longer Hp 2 alpha-chain and the Hp 2 specific peptide that is detected by MS. (B) Total ion current chromatograms of a common peptide that is shared by the two Hp phenotypes (left panel) and total ion current chromatogram of the Hp 2 specific peptide. As expected, equal signal intensity was found for the common peptide. The Hp 2 specific peptide appears as a strong signal with the Hp 2-2 sample, while it was only marginally detected as a contaminant in the Hp 1-1 preparation.
