# Supplementary material
Source: PubMed Central journal article supplement (PMC3809386)
Supplement: Supp_Figure3.pdf [file Supp_Figure3.pdf]

## SUPPLEMENTARY FIGURE 3

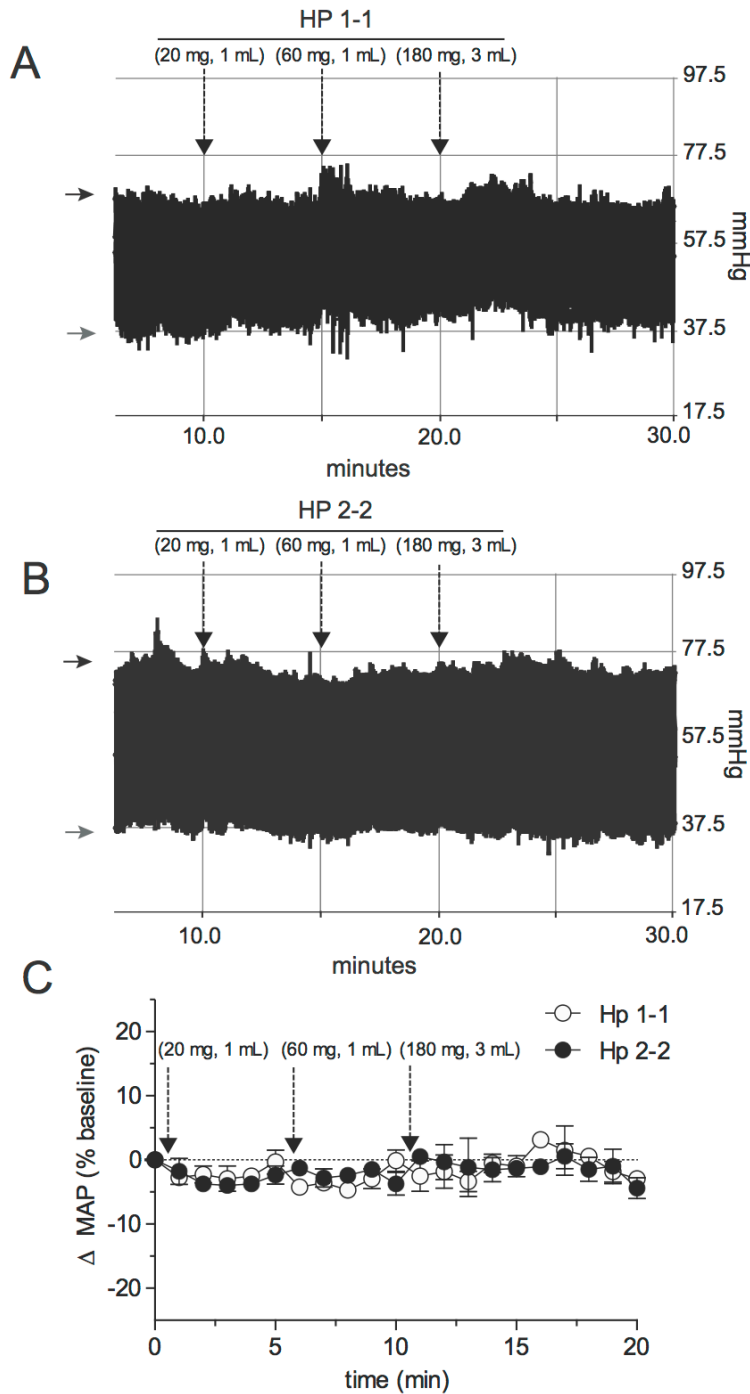**Blood pressure response to Hp infusion in the absence of extracellular Hb (A and B)**

Demonstrate representative physiographic representation of systolic (black left axis arrow) and diastolic (grey left axis arrow) following infusion of Hp 1-1 (A) or Hp 2-2 (B), respectively. The infusion protocol was as follows: (1) 20 mg (1 mL), 60 mg (1 mL) and 180 mg (1 mL) Hp 1-1. Each dose was infused at a rate of 1 ml/min followed by a 10 minute monitoring period. After the 180 mg/ml (3 mL), blood pressures were monitored for 20 minutes. (C) Represents the change in mean arterial (MAP) from baseline values. Data are represented mean % of baseline values  $\pm$  se. (n=3/group). No differences between groups or basal values were detected by ANOVA with a post hoc Bonferroni's test for multiple comparisons.
