# Supplementary material
Source: PubMed Central journal article supplement (PMC3809386)
Supplement: Supp_Figure5.pdf [file Supp_Figure5.pdf]

## SUPPLEMENTARY FIGURE 5

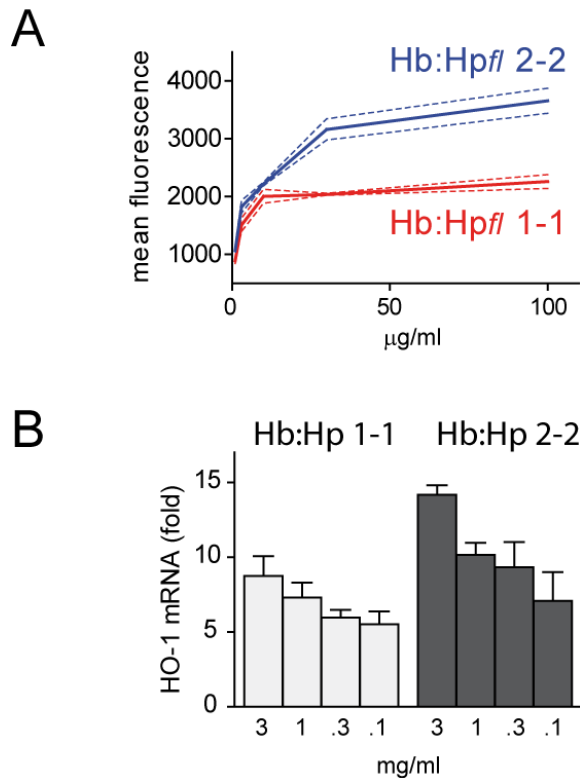**Cellular complex uptake and HO-1 mRNA induction by Hb:Hp 1-1 and Hb:Hp 2-2**

**(A)** CD163<sup>+</sup> HEK293 cells were incubated for 30 minutes with Alexa-488-labeled Hb:Hp<sub>fl</sub> 1-1 or Hb:Hp<sub>fl</sub> 2-2 at five different concentrations: 100 µg/ml, 30 µg/ml, 10 µg/ml, 3 µg/ml, and 1 µg/ml. After washing, mean cellular fluorescence was determined by FACS. Data is represented as mean ± SEM of triplicate experiments. **(B)** CD163<sup>+</sup> HEK293 cells were incubated for eight hours with HPLC purified HbHp1-1 or HbHp2-2 complexes. Each ligand was applied in four different concentrations (3 mg/ml, 1 mg/ml, and 0.3 mg/ml, 0.1 mg/ml). HO-1 induction was determined as fold induction relative to non-treated cells by quantitative Real-Time PCR and normalized to GAPDH. The results are shown as mean ± SEM of triplicate experiments.

**Methods:** CD163-mediated endocytosis of fluorescent Hb:Hp complexes was studied using CD163 transduced HEK293 cells, as described<sup>1</sup>. Hp 1-1 and 2-2, respectively, were labeled with Alexa Fluor-488 dye using the Alexa-488 labeling kit (Molecular Probes, Invitrogen) according to the manufacturer's protocol. Equal labeling of Hp was confirmed with a fluorescence spectrophotometer. To quantify HbHp<sub>fl</sub> 1-1/2-2 uptake, complexes were incubated on CD163-expressing HEK293 cells for 45 minutes at 37 °C. HO-1 induction in CD163-expressing HEK293 cells was measured by RT-PCR as described previously<sup>2</sup>.

1. Schaer DJ, Schaer CA, Buehler PW, et al. CD163 is the macrophage scavenger receptor for native and chemically modified hemoglobins in the absence of haptoglobin. *Blood*. 2006;107(1):373-380.

2. Schaer CA, Schoedon G, Imhof A, Kurrer MO, Schaer DJ. Constitutive endocytosis of CD163 mediates hemoglobin-heme uptake and determines the noninflammatory and protective transcriptional response of macrophages to hemoglobin. *Circ Res*. 2006;99(9):943-950.
