# Supplementary material
Source: PubMed Central journal article supplement (PMC3809386)
Supplement: Supp_Figure6.pdf [file Supp_Figure6.pdf]

## SUPPLEMENTARY FIGURE 6

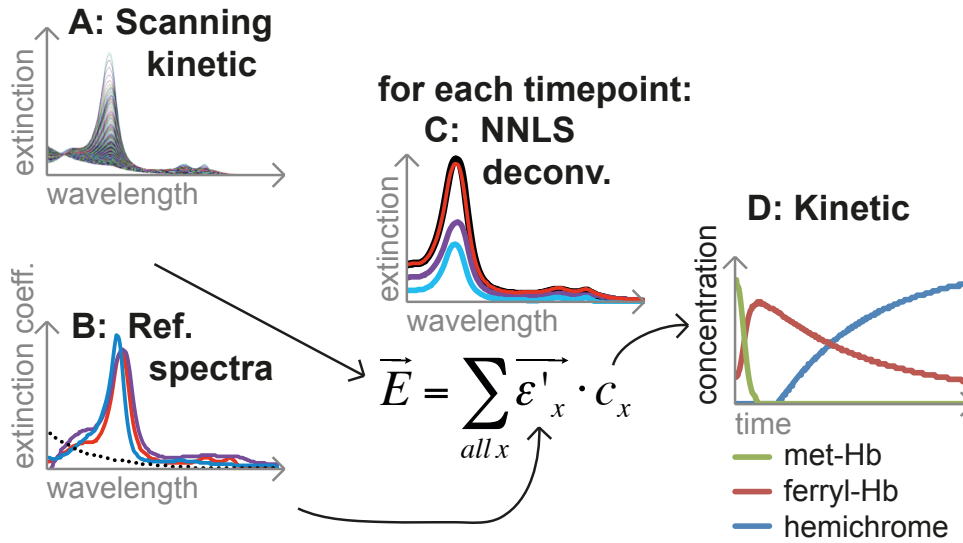**Principle of spectral deconvolution for the determination of Hb oxidation species.**

**(A)** A continuous spectrum of the reaction mixture is recorded every minute in the range of 300-700nm in 2nm steps. **(B)** Reference spectra of known concentrations of each expected compound in the reaction are recorded in the same spectral range. **(C)** For every individual time-point the concentration of each compound is calculated using the Non-Negative Least Squares (NNLS) algorithm to solve the linear equation\* (using R[REF] in a python [REF] script). **(D)** Final result of the spectral deconvolution procedure plotted as compound concentration versus time.

\* the equation applies the Beer-Lambert-Law:  $E$  is the measured Extinction (as a vector including all measured wavelengths),  $\epsilon'_x$  the extinction coefficient vector and  $c_x$  the compound  $x$  concentration.
